# Supplementary material
Source: PubMed Central journal article supplement (PMC3230559)
Supplement: isl0205_0278SD1.pdf [file isl0205_0278SD1.pdf]

## Supplemental Figure A.

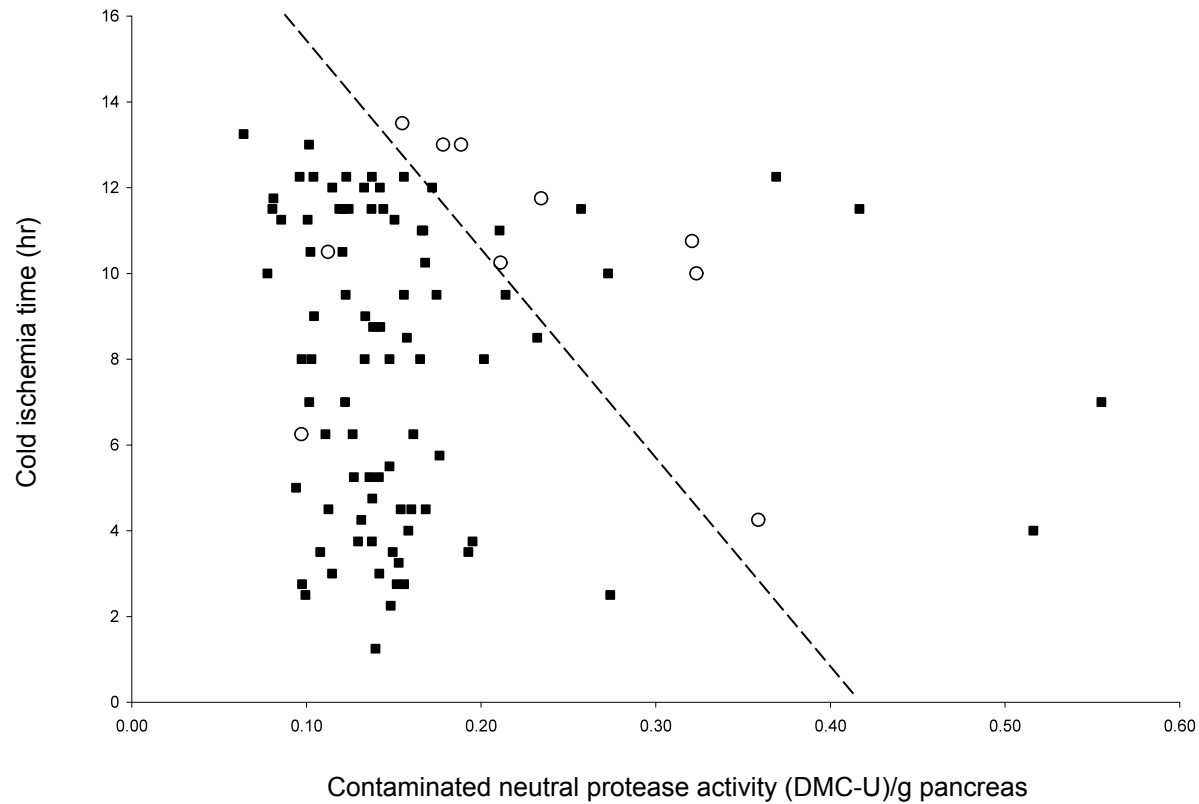

The data were segregated into two regions by a dotted line. The right region shows that 8 of 16 isolations (50%) were performed without neutral protease supplementation whereas the left region has only 2 isolations without neutral protease (2.6%) ( $P < 0.001$ ), demonstrating interplay between preexisting neutral protease contamination and cold ischemia time in requirement of neutral protease supplementation. *White circle, no-NP group; black square, control group.*
